# Supplementary material for: A robust superhydrophobic PDMS@ZnSn(OH)6 coating with under-oil self-cleaning and flame retardancy
Source: Royal Society of Chemistry journal article supplement (doi:10.1039/c7ta06190k), 2017-01-01
Supplement: c7ta06190k1.pdf [file c7ta06190k1.pdf]

## Supporting Information

### **A Robust Superhydrophobic PDMS@ZnSn(OH)<sub>6</sub> Coating with Under-Oil Self-Cleaning and Flame Retardancy**

Mengying Long, Shan Peng\*, Wanshun Deng, Xinrui Miao, Ni Wen, Qiannan Zhou,  
Xiaojun Yang, Wenli Deng\*

*College of Materials Science and Engineering, South China University of Technology,  
Wushan Road, Tianhe District, Guangzhou 510640, PR China*

E-mail: pengshan5213@163.com.

E-mail: wldeng@scut.edu.cn. Tel.: (+86)020-22236708.

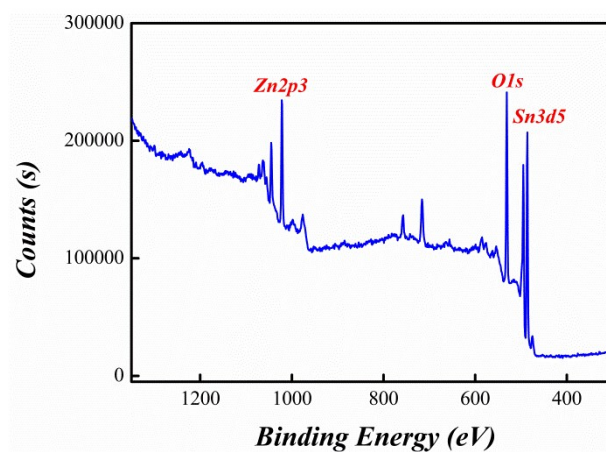

**Figure S1.** XPS spectrum of the original ZHS particles.

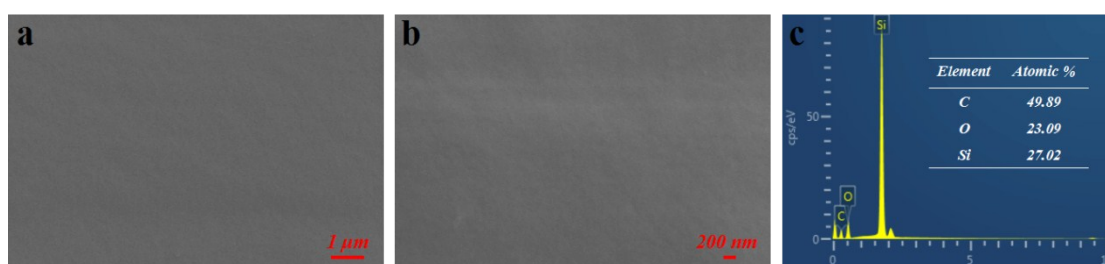

**Figure S2.** PDMS covers on glass substrate. (a, b) The low-, high-magnification SEM images and (c) EDS spectrum of the PDMS coated glass surface.

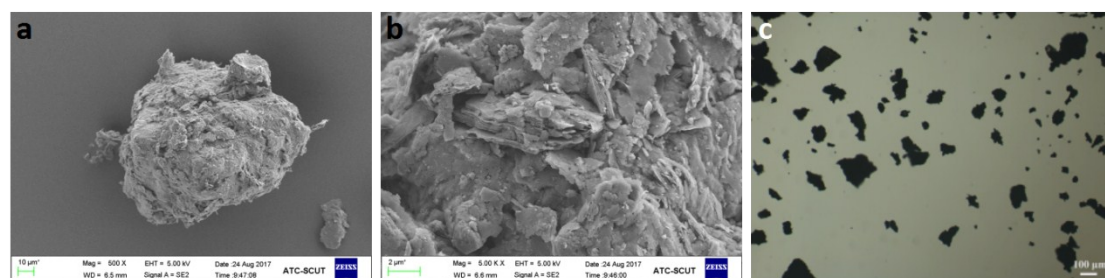

**Figure S3.** (a) Low- and (b) high-magnification SEM images of the dust. (c) The dust observed under the polarizing microscope.

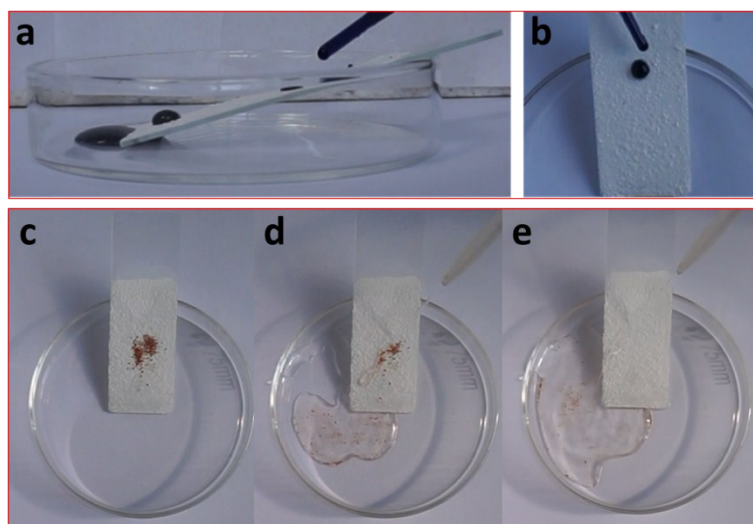

**Figure S4.** (a) Top- and (b) side-view of the water droplets on the PDMS@ZHS coated glass surface contaminated by dodecane. (c–e) Self-cleaning tests on the dodecane contaminated surface.

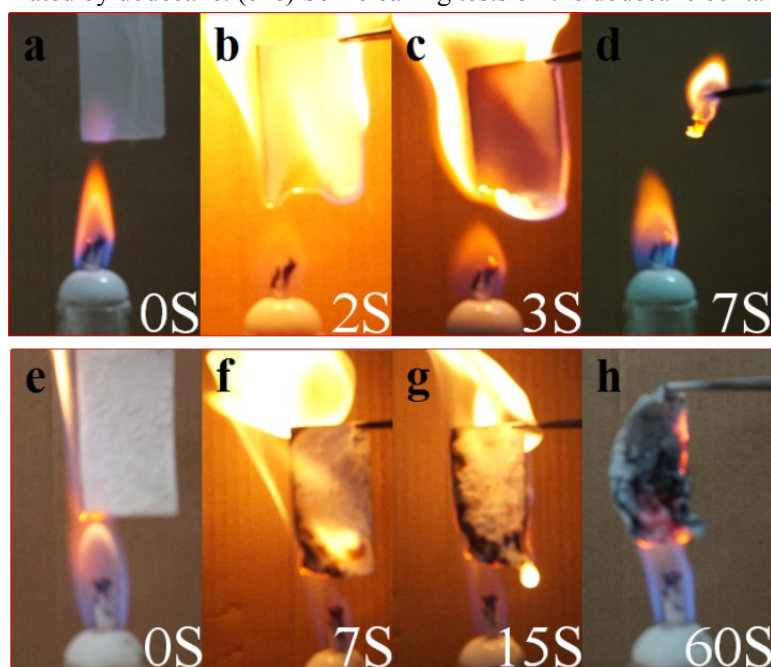

**Figure S5.** Combustion behaviors of PDMS@ZHS coated on paper after immersion in hexadecane. The combustion procedures of the (a) uncoated, and (b) the PDMS@ZHS coated paper after being immersed into hexadecane.

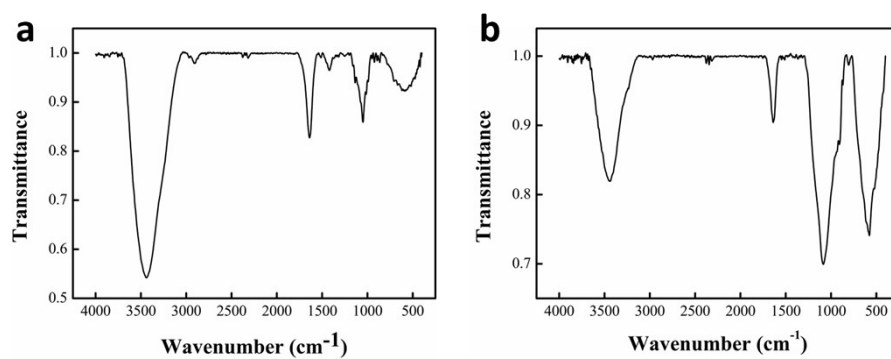

**Figure S6.** FT-IR spectrums of the burned (a) uncoated paper and (b) PDMS@ZHS coated paper.

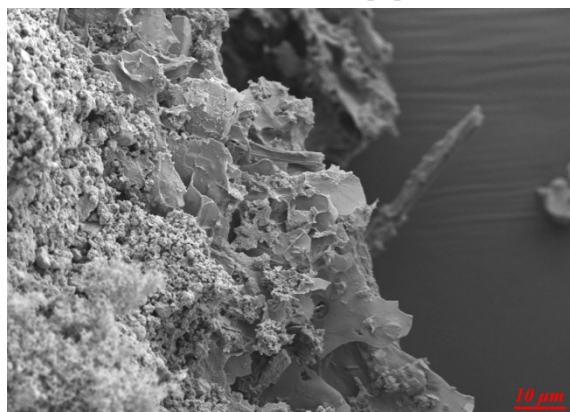

**Figure S7.** SEM image of the residue after the vertical test.
